# Supplementary material for: Factors associated with whole carcass condemnation rates in provincially-inspected abattoirs in Ontario 2001-2007: implications for food animal syndromic surveillance
Source: Springer Nature journal article supplement (doi:10.1186/1746-6148-6-42), 2010-01-01

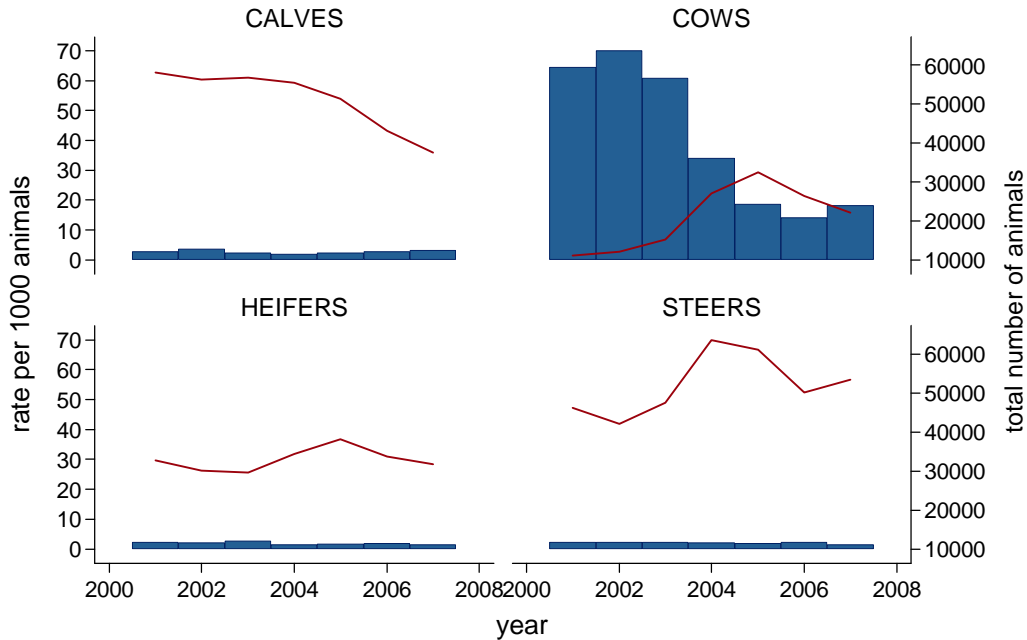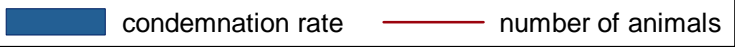

Supplement: 12917_2009_222_MOESM2_ESM.pdf [file 12917_2009_222_MOESM2_ESM.pdf]
